# Supplementary material for: Achieving ultrastability and efficient lithium storage capacity with high-energy iron(ii) oxalate anode materials by compositing Ge nano-conductive sites
Source: Royal Society of Chemistry journal article supplement (doi:10.1039/d2nr06422g), 2023-01-01
Supplement: d2nr06422g1.pdf [file d2nr06422g1.pdf]

## Supporting Information

### **Achieving ultrastability and efficiency lithium storage capacity of high-energy iron (II) oxalate anode materials through compositing Ge nano-conductive sites**

Tingyu Song <sup>a,b</sup>, Geng Gao <sup>a,b</sup>, Dingfang Cui <sup>c</sup>, Chong Wang <sup>c</sup>, Hui Zhang <sup>a,b</sup>, Feng Liang <sup>a,b</sup>,

Bin Yang <sup>a</sup>, Keyu Zhang <sup>a,b,\*</sup>, Yaochun Yao <sup>a,b,\*</sup>

- National Engineering Research Center of Vacuum Metallurgy, Faculty of Metallurgy and Energy Engineering, Kunming University of Science and Technology, Kunming 650093, China.
- National Local Joint Engineering Laboratory of Lithium Ion Battery and Material Preparation Technology, Kunming University of Science and Technology, Kunming, 650093, China.
- Yunnan Chihong International Germanium Industry Co., Ltd., Qujing 655011, China.

#### **1. Results and discussion**

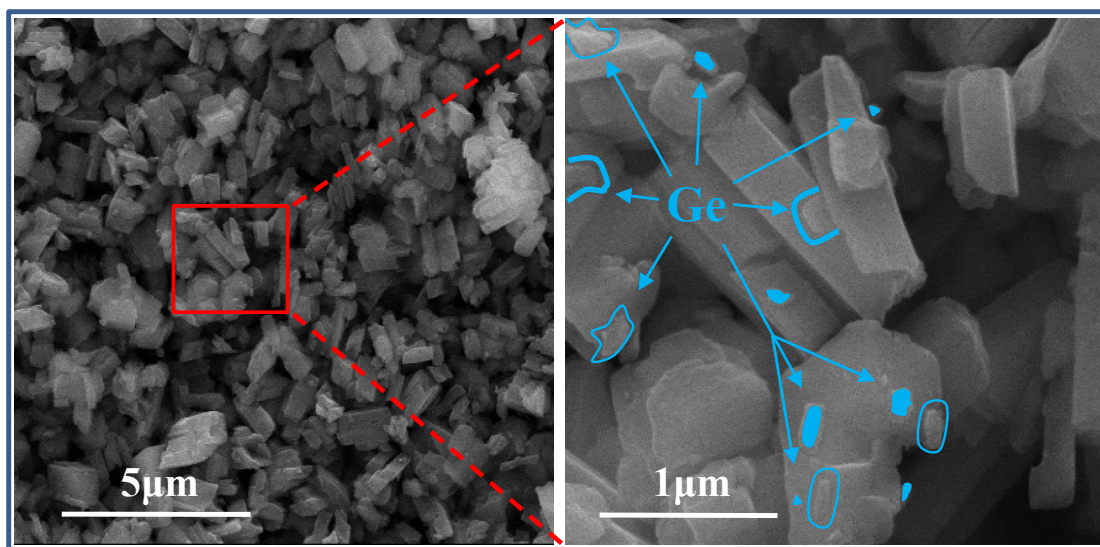

Fig. S1 SEM of FCO@Ge material and its local enlargement.

\* Corresponding author. National Engineering Laboratory for Vacuum Metallurgy, Kunming University of Science and Technology, Kunming 650093, Yunnan Province, China  
E-mail address: yaochun9796@163.com (Pro. Y. Yao)

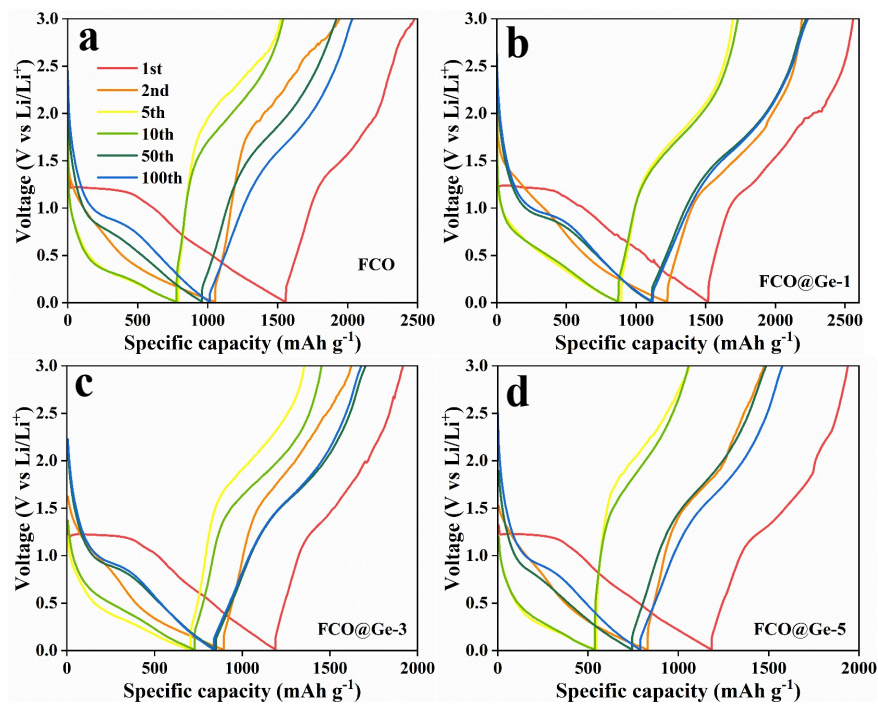

Fig. S2 Charge and discharge curves of FCO (a), FCO@Ge-1 (b), FCO@Ge-3 (c), and FCO@Ge-

5.
